# Supplementary material
Source: PubMed Central journal article supplement (PMC4981555)
Supplement: NIHMS744791-supplement-Supplementary__Materials_3__Patient_Preferences.pdf [file NIHMS744791-supplement-Supplementary__Materials_3__Patient_Preferences.pdf]

## CanSeq Patient Preference Questions

### You have my permission to tell my doctors and me about any gene test result *related to cancer* that...

- Might qualify me for a clinical study of a research drug.  
\_\_\_\_\_ YES \_\_\_\_\_ NO (Please initial one)
- Might tell me that I have a **better** than average prognosis (outlook) for my type of cancer  
\_\_\_\_\_ YES \_\_\_\_\_ NO (Please initial one)
- Might tell me that I have a **worse** than average prognosis (outlook) for my type of cancer  
\_\_\_\_\_ YES \_\_\_\_\_ NO (Please initial one)
- Might identify me (and possibly my family members) as having an increased risk of developing certain cancers.  
\_\_\_\_\_ YES \_\_\_\_\_ NO (Please initial one)
- Might tell me about how my body handles chemotherapy or other cancer medications.  
\_\_\_\_\_ YES \_\_\_\_\_ NO (Please initial one)

### You have my permission to tell my doctors and me about any gene test result *unrelated to cancer* that...

- Might identify me (and possibly my family members) as having a condition, or having an increased risk of developing a condition, *other than cancer* that **can** be treated.  
\_\_\_\_\_ YES \_\_\_\_\_ NO (Please initial one)
- Might identify me (and possibly my family members) as having a condition, or having an increased risk of developing a condition, *other than cancer* that **cannot** be treated.  
\_\_\_\_\_ YES \_\_\_\_\_ NO (Please initial one)
- Might tell me about how my body handles non-cancer-related medications.  
\_\_\_\_\_ YES \_\_\_\_\_ NO (Please initial one)
