# Supplementary material
Source: PubMed Central journal article supplement (PMC4981555)
Supplement: NIHMS744791-supplement-Supplementary__Materials_4__Patient_Survey.pdf [file NIHMS744791-supplement-Supplementary__Materials_4__Patient_Survey.pdf]

## CanSeq

Thank you for agreeing to participate in the CanSeq research study.

For each of the questions below, please select the one response that best applies to you.

There are no right or wrong answers. The information you provide will be strictly confidential.

1. From the list below, please mark the box next to the statement that best describes your current level of physical ability and activity.

|                          |                                                                                                                                                                                |
|--------------------------|--------------------------------------------------------------------------------------------------------------------------------------------------------------------------------|
| <input type="checkbox"/> | I am fully active and able to carry out activities the same as before my cancer diagnosis, without any restrictions.                                                           |
| <input type="checkbox"/> | I have difficulty with physically strenuous activity but I am able to walk and carry out work that is light or based in one location; such as light house-work or office-work. |
| <input type="checkbox"/> | I can walk and take care of myself, but I am not able to carry out work activities; I am up and about more than half the hours that I am awake.                                |
| <input type="checkbox"/> | I am capable only of limited self-care and spend more than half the hours that I am awake in bed or in a chair.                                                                |
| <input type="checkbox"/> | I am completely disabled, cannot carry on any self-care, and am totally confined to a bed or chair.                                                                            |

2. We are interested in some things about you and your health. Please answer the following questions by marking the box that best applies to you.

|                                                                                                          | Not at all               | A little                 | Quite a bit              | Very much                |
|----------------------------------------------------------------------------------------------------------|--------------------------|--------------------------|--------------------------|--------------------------|
| a. Do you have any trouble doing strenuous activities, like carrying a heavy shopping bag or a suitcase? | <input type="checkbox"/> | <input type="checkbox"/> | <input type="checkbox"/> | <input type="checkbox"/> |
| b. Do you have any trouble taking a long walk?                                                           | <input type="checkbox"/> | <input type="checkbox"/> | <input type="checkbox"/> | <input type="checkbox"/> |
| c. Do you have any trouble taking a short walk outside of the house?                                     | <input type="checkbox"/> | <input type="checkbox"/> | <input type="checkbox"/> | <input type="checkbox"/> |
| d. Do you need to stay in bed or a chair during the day?                                                 | <input type="checkbox"/> | <input type="checkbox"/> | <input type="checkbox"/> | <input type="checkbox"/> |
| e. Do you need help with eating, dressing, washing yourself or using the toilet?                         | <input type="checkbox"/> | <input type="checkbox"/> | <input type="checkbox"/> | <input type="checkbox"/> |

Patient ID:

3. During the past week:

|                                                                                | Not at all               | A little                 | Quite a bit              | Very much                |
|--------------------------------------------------------------------------------|--------------------------|--------------------------|--------------------------|--------------------------|
| a. Were you limited in doing either your work or other daily activities?       | <input type="checkbox"/> | <input type="checkbox"/> | <input type="checkbox"/> | <input type="checkbox"/> |
| b. Were you limited in pursuing your hobbies or other leisure time activities? | <input type="checkbox"/> | <input type="checkbox"/> | <input type="checkbox"/> | <input type="checkbox"/> |
| c. Were you short of breath?                                                   | <input type="checkbox"/> | <input type="checkbox"/> | <input type="checkbox"/> | <input type="checkbox"/> |
| d. Have you had pain?                                                          | <input type="checkbox"/> | <input type="checkbox"/> | <input type="checkbox"/> | <input type="checkbox"/> |
| e. Did you need to rest?                                                       | <input type="checkbox"/> | <input type="checkbox"/> | <input type="checkbox"/> | <input type="checkbox"/> |
| f. Have you had trouble sleeping?                                              | <input type="checkbox"/> | <input type="checkbox"/> | <input type="checkbox"/> | <input type="checkbox"/> |
| g. Have you felt weak?                                                         | <input type="checkbox"/> | <input type="checkbox"/> | <input type="checkbox"/> | <input type="checkbox"/> |
| h. Have you lacked appetite?                                                   | <input type="checkbox"/> | <input type="checkbox"/> | <input type="checkbox"/> | <input type="checkbox"/> |
| i. Have you felt nauseated?                                                    | <input type="checkbox"/> | <input type="checkbox"/> | <input type="checkbox"/> | <input type="checkbox"/> |
| j. Have you vomited?                                                           | <input type="checkbox"/> | <input type="checkbox"/> | <input type="checkbox"/> | <input type="checkbox"/> |
| k. Have you been constipated?                                                  | <input type="checkbox"/> | <input type="checkbox"/> | <input type="checkbox"/> | <input type="checkbox"/> |

Patient ID:

4. During the past week:

|                                                                                                         | Not at all               | A little                 | Quite a bit              | Very much                |
|---------------------------------------------------------------------------------------------------------|--------------------------|--------------------------|--------------------------|--------------------------|
| a. Have you had diarrhea?                                                                               | <input type="checkbox"/> | <input type="checkbox"/> | <input type="checkbox"/> | <input type="checkbox"/> |
| b. Were you tired?                                                                                      | <input type="checkbox"/> | <input type="checkbox"/> | <input type="checkbox"/> | <input type="checkbox"/> |
| c. Did pain interfere with your daily activities?                                                       | <input type="checkbox"/> | <input type="checkbox"/> | <input type="checkbox"/> | <input type="checkbox"/> |
| d. Have you had difficulty in concentrating on things, like reading a newspaper or watching television? | <input type="checkbox"/> | <input type="checkbox"/> | <input type="checkbox"/> | <input type="checkbox"/> |
| e. Did you feel tense?                                                                                  | <input type="checkbox"/> | <input type="checkbox"/> | <input type="checkbox"/> | <input type="checkbox"/> |
| f. Did you worry?                                                                                       | <input type="checkbox"/> | <input type="checkbox"/> | <input type="checkbox"/> | <input type="checkbox"/> |
| g. Did you feel irritable?                                                                              | <input type="checkbox"/> | <input type="checkbox"/> | <input type="checkbox"/> | <input type="checkbox"/> |
| h. Did you feel depressed?                                                                              | <input type="checkbox"/> | <input type="checkbox"/> | <input type="checkbox"/> | <input type="checkbox"/> |
| i. Have you had difficulty remembering things?                                                          | <input type="checkbox"/> | <input type="checkbox"/> | <input type="checkbox"/> | <input type="checkbox"/> |
| j. Has your physical condition or medical treatment interfered with your family life?                   | <input type="checkbox"/> | <input type="checkbox"/> | <input type="checkbox"/> | <input type="checkbox"/> |
| k. Has your physical condition or medical treatment interfered with your social activities?             | <input type="checkbox"/> | <input type="checkbox"/> | <input type="checkbox"/> | <input type="checkbox"/> |
| l. Has your physical condition or medical treatment caused you financial difficulties?                  | <input type="checkbox"/> | <input type="checkbox"/> | <input type="checkbox"/> | <input type="checkbox"/> |

For the following questions please mark the number between 1 and 7 that best applies to you.

5. How would you rate your overall health during the past week?

Very poor Excellent

1     2     3     4     5     6     7

6. How would you rate your overall quality of life during the past week?

Very poor Excellent

1     2     3     4     5     6     7

Now we would like to know more about how you are **currently** feeling. For each statement below, please choose 1 response that best describes your current feelings.

7. I feel tense or 'wound up':
- Most of the time  
 A lot of the time  
 From time to time, occasionally  
 Not at all
8. I still enjoy the things I used to enjoy:
- Definitely as much  
 Not quite so much  
 Only a little  
 Hardly at all
9. I get a sort of frightened feeling as if something awful is about to happen:
- Very definitely and quite badly  
 Yes, but not too badly  
 A little, but it doesn't worry me  
 Not at all
10. I can laugh and see the funny side of things:
- As much as I always could  
 Not quite so much now  
 Definitely not so much now  
 Not at all
11. Worrying thoughts go through my mind:
- A great deal of the time  
 A lot of the time  
 From time to time, but not too often  
 Only occasionally
12. I feel cheerful:
- Not at all  
 Not often  
 Sometimes  
 Most of the time
13. I can sit at ease and feel relaxed:
- Definitely  
 Usually  
 Not Often  
 Not at all
14. I feel as if I am slowed down:
- Nearly all the time  
 Very often  
 Sometimes  
 Not at all
15. I get a sort of frightened feeling like 'butterflies' in the stomach:
- Not at all  
 Occasionally  
 Quite Often  
 Very Often
16. I have lost interest in my appearance:
- Definitely  
 I don't take as much care as I should  
 I may not take quite as much care  
 I take just as much care as ever
17. I feel restless as if I have to be on the move:
- Very much indeed  
 Quite a lot  
 Not very much  
 Not at all
18. I look forward with enjoyment to things:
- As much as I ever did  
 Rather less than I used to  
 Definitely less than I used to  
 Hardly at all
19. I get sudden feelings of panic:
- Very often indeed  
 Quite often  
 Not very often  
 Not at all
20. I can enjoy a good book or radio or TV program:
- Often  
 Sometimes  
 Not often  
 Very seldom

Patient ID:

Next, we'd like to ask you some questions about your experience with and beliefs about genetic testing.

For each of the following items, please mark the number between 1 and 5 that best describes your attitude about having a genetic test.

For me a genetic test is...

21. a. A bad thing A good thing
- 
- 1      2      3      4      5
- 
- b. Beneficial Harmful
- 
- 1      2      3      4      5
- 
- c. Important Unimportant
- 
- 1      2      3      4      5

22. Before you joined this CanSeq study, did you ever have a genetic test to find out if you are at increased risk for a disease?

- Yes
- No
- Don't Know

23. As far as you know, is each of the following statements about genetics and genetic testing true or false, or are you not sure?

|                                                                                                                                        | True                     | False                    | Not Sure                 |
|----------------------------------------------------------------------------------------------------------------------------------------|--------------------------|--------------------------|--------------------------|
| a. If a person has a genetic mutation for a disease, the person will always get the disease.                                           | <input type="checkbox"/> | <input type="checkbox"/> | <input type="checkbox"/> |
| b. Only mothers can pass on genetic diseases.                                                                                          | <input type="checkbox"/> | <input type="checkbox"/> | <input type="checkbox"/> |
| c. People can be healthy even if they have a genetic mutation for a disease.                                                           | <input type="checkbox"/> | <input type="checkbox"/> | <input type="checkbox"/> |
| d. Genetic testing can be used in adults to find out if they have a greater than average chance of developing certain kinds of cancer. | <input type="checkbox"/> | <input type="checkbox"/> | <input type="checkbox"/> |
| e. Genetic testing can be used in adults to find out if they have a greater than average chance of developing depression.              | <input type="checkbox"/> | <input type="checkbox"/> | <input type="checkbox"/> |
| f. Genetic testing can be used in adults to predict whether a person will have a heart attack.                                         | <input type="checkbox"/> | <input type="checkbox"/> | <input type="checkbox"/> |
| g. Genetic testing can be used during pregnancy to find out whether the baby will develop sickle cell disease or cystic fibrosis.      | <input type="checkbox"/> | <input type="checkbox"/> | <input type="checkbox"/> |

25. Please select 1 statement that best reflects the role you prefer when making decisions about treatment for your cancer.

- I prefer to make the decision about which treatment I will receive.
- I prefer to make the final decision about my treatment after seriously considering my doctor's opinion.
- I prefer that my doctor and I share responsibility for deciding which treatment is best for me.
- I prefer that my doctor makes the final decision about my treatment after seriously considering my opinion.
- I prefer to leave all decisions regarding my treatment to my doctor.

The questionnaire is almost complete. For the next section, we would like to know a little more about you.

26. How often do you have problems learning about your medical condition because of difficulty understanding written information?

- All of the time
- Most of the time
- Some of the time
- A little of the time
- None of the time

27. How confident are you filling out medical forms by yourself?

- Extremely
- Quite a bit
- Somewhat
- A little bit
- Not at all

28. How often do you have someone (like a family member, friend, hospital/clinic worker or caregiver) help you read hospital materials?

- All of the time
- Most of the time
- Some of the time
- A little of the time
- None of the time

29. How good are you at working with fractions?

|                          |                          |                          |                          |                          |                          |                   |
|--------------------------|--------------------------|--------------------------|--------------------------|--------------------------|--------------------------|-------------------|
| Not at all<br>good       |                          |                          |                          |                          |                          | Extremely<br>good |
| <input type="checkbox"/> |                   |
| 1                        | 2                        | 3                        | 4                        | 5                        | 6                        |                   |

30. How good are you at working with percentages?

|                          |                          |                          |                          |                          |                          |                   |
|--------------------------|--------------------------|--------------------------|--------------------------|--------------------------|--------------------------|-------------------|
| Not at all<br>good       |                          |                          |                          |                          |                          | Extremely<br>good |
| <input type="checkbox"/> |                   |
| 1                        | 2                        | 3                        | 4                        | 5                        | 6                        |                   |

31. When reading a newspaper, how helpful do you find tables and graphs that are part of the story?

|                          |                          |                          |                          |                          |                          |           |
|--------------------------|--------------------------|--------------------------|--------------------------|--------------------------|--------------------------|-----------|
| Not at all               |                          |                          |                          |                          |                          | Extremely |
| <input type="checkbox"/> |           |
| 1                        | 2                        | 3                        | 4                        | 5                        | 6                        |           |

32. When people tell you the chance of something happening, do you prefer that they use *words* (“it rarely happens”) or *numbers* (“there’s a 1% chance”)?

|                                                                                                                                                                   |                          |
|-------------------------------------------------------------------------------------------------------------------------------------------------------------------|--------------------------|
| Always prefer<br>words                                                                                                                                            | Always prefer<br>numbers |
| <input type="checkbox"/> 1 <input type="checkbox"/> 2 <input type="checkbox"/> 3 <input type="checkbox"/> 4 <input type="checkbox"/> 5 <input type="checkbox"/> 6 |                          |

33. To what extent do you consider yourself a religious person?

- Very religious
- Moderately religious
- Slightly religious
- Not religious at all

34. To what extent do you consider yourself a spiritual person?

- Very spiritual
- Moderately spiritual
- Slightly spiritual
- Not spiritual at all

35. Think about how much you try to understand and deal with major problems in your life. To what extent does each of the statements below reflect the way you cope?

|                                                                    | A great deal             | Quite a bit              | Somewhat                 | Not at all               |
|--------------------------------------------------------------------|--------------------------|--------------------------|--------------------------|--------------------------|
| a. I think about how my life is part of a larger spiritual force.  | <input type="checkbox"/> | <input type="checkbox"/> | <input type="checkbox"/> | <input type="checkbox"/> |
| b. I work together with God as partners to get through hard times. | <input type="checkbox"/> | <input type="checkbox"/> | <input type="checkbox"/> | <input type="checkbox"/> |
| c. I look to God for strength, support and guidance in crises.     | <input type="checkbox"/> | <input type="checkbox"/> | <input type="checkbox"/> | <input type="checkbox"/> |

36. What is your religion? *Please check all that apply.*

- Protestant (*please specify denomination*): \_\_\_\_\_
- Catholic
- Jewish
- Born-again or Evangelical Christian
- Mormon/Latter-day Saints
- Muslim
- Buddhist
- Hindu
- Unitarian Universalist
- No religion
- Atheist
- Other religion (*please specify*): \_\_\_\_\_



37. Do you consider yourself Hispanic, Latino/a or Spanish?

- No
- Yes

If yes, please select the primary group you belong to from the list below:

- Mexican (from Mexico), Mexican American, Chicano
- Puerto Rican
- Cuban
- Dominican
- Other (*please specify*): \_\_\_\_\_

38. What is your race? *Please check all that apply.*

|                                                                    |                                                                                                                                                                                                                                                                                                                                                                                                                                                                                             |
|--------------------------------------------------------------------|---------------------------------------------------------------------------------------------------------------------------------------------------------------------------------------------------------------------------------------------------------------------------------------------------------------------------------------------------------------------------------------------------------------------------------------------------------------------------------------------|
| <input type="checkbox"/> White                                     |                                                                                                                                                                                                                                                                                                                                                                                                                                                                                             |
| <input type="checkbox"/> Black or African American                 |                                                                                                                                                                                                                                                                                                                                                                                                                                                                                             |
| <input type="checkbox"/> American Indian or Alaska Native          | Please tell us the name of your enrolled or principal tribe:<br>_____                                                                                                                                                                                                                                                                                                                                                                                                                       |
| <input type="checkbox"/> Japanese                                  |                                                                                                                                                                                                                                                                                                                                                                                                                                                                                             |
| <input type="checkbox"/> Chinese                                   |                                                                                                                                                                                                                                                                                                                                                                                                                                                                                             |
| <input type="checkbox"/> Other East Asian                          | Please select your primary East Asian Group below:<br><input type="checkbox"/> Korean<br><input type="checkbox"/> Vietnamese<br><input type="checkbox"/> Taiwanese<br><input type="checkbox"/> Other ( <i>please specify</i> ): _____                                                                                                                                                                                                                                                       |
| <input type="checkbox"/> South East Asian or Indian                | Please select your primary South East Asian racial group below:<br><input type="checkbox"/> East Indian<br><input type="checkbox"/> Filipino<br><input type="checkbox"/> Vietnamese<br><input type="checkbox"/> Laotian<br><input type="checkbox"/> Guamanian or Chamorro<br><input type="checkbox"/> Hmong<br><input type="checkbox"/> Thai<br><input type="checkbox"/> Pakistani<br><input type="checkbox"/> Cambodian<br><input type="checkbox"/> Other ( <i>please specify</i> ): _____ |
| <input type="checkbox"/> Native Hawaiian or other Pacific Islander |                                                                                                                                                                                                                                                                                                                                                                                                                                                                                             |
| <input type="checkbox"/> Other                                     | <i>Please specify</i> : _____                                                                                                                                                                                                                                                                                                                                                                                                                                                               |

39. What is your preferred language?

- English
- Spanish
- Other (*please specify*): \_\_\_\_\_

40. What is the highest level of education you have completed?

- None
- Some grade school (grades 1 to 7)
- Grade school graduate (grade 8)
- Some high school (grades 9 to 12)
- High school graduate or GED
- Post high school training other than college (vocational, technical, etc.)
- Some college or Associates degree
- College graduate
- Master's degree
- Doctoral degree

41. As of today, what is your employment status?

- Employed more than or equal to 32 hrs/wk
- Employed less than 32 hrs/wk
- Employed, but on medical leave
- Full-time student
- Part-time student
- Unemployed, seeking work
- Homemaker
- Unable to work due to disability
- Retired
- Other (*please specify*): \_\_\_\_\_

42. From the list below, please choose the response that best reflects your current marital status.

- Legally married or registered domestic partners
- Living with a partner to whom you are not married
- In a serious relationship but not living with a partner
- Single
- Separated
- Divorced
- Widowed
- Other (Please specify): \_\_\_\_\_

42a. Some people who join this study are hoping that the sequencing results will help answer questions that they have about their health or their family's health. We cannot promise that the sequencing results will answer your questions. However, if you do have questions you are hoping the study will answer, please use the space below to tell us about them (optional).

---

---

---

Finally, we would like to ask you some questions that will help us to understand whether cancer and other diseases might run in your family.

43. Have you had more than 10 colon polyps in your lifetime?

- Yes
- No
- Don't Know

44. Are your ancestors of Ashkenazi Jewish descent?

- Yes
- No
- Don't Know

45. Are you adopted?

No

**Please continue to next page.**

Yes

Don't Know

46. Do you have information about your biological family?

No

**That is all the questions we have.  
Thank you very much for completing our survey.**

Yes

**Please continue to next page.**

Answer the remaining questions to the best of your ability, based on information you may have about your *BLOOD* relatives.

Think about your **biological MOTHER**.

47. How many sisters does (did) your MOTHER have? \_\_\_\_\_

48. How many brothers does (did) your MOTHER have? \_\_\_\_\_

Think about your **biological FATHER**.

49. How many sisters does (did) your FATHER have? \_\_\_\_\_

50. How many brothers does (did) your FATHER have? \_\_\_\_\_

51. Do you believe that an *increased risk of developing cancer* runs in your family?
- Yes
  - No
  - Don't Know

52. Complete the following table to the best of your ability, for any of your *CLOSE BLOOD RELATIVES* who have **had cancer**. Please list which family member(s) have had cancer, what type(s) of cancer(s) they have had, and **the approximate age** at which their cancers were diagnosed (For example: "60's"). If you do not know the type of cancer or age when diagnosed, please indicate 'don't know.'

A list of cancers appears on the last page of this questionnaire.

**Close blood relatives include:** Mother, Father, Daughter, Son, Sister, Brother, Half-sister, Half-Brother (note mother or father's side)\*\*

| Relationship to you<br>(** see list above) | Type of cancer | Approximate age when cancer was diagnosed |
|--------------------------------------------|----------------|-------------------------------------------|
| Example:<br>Sister                         | Breast         | 60's                                      |
|                                            |                |                                           |
|                                            |                |                                           |
|                                            |                |                                           |
|                                            |                |                                           |
|                                            |                |                                           |

Patient ID:

53. Please complete the following table to the best of your ability, for any of your EXTENDED FAMILY MEMBERS who are *BLOOD RELATIVES* and have **had cancer**. Please tell us which family member(s) have had cancer, what type(s) of cancer(s) they have had, and **the approximate age** at which their cancers were diagnosed (For example: "60's.") If you do not know the type of cancer or age when diagnosed, please indicate 'don't know.'

A list of cancers appears on the last page of this questionnaire for your reference.

**Extended family members include:** Aunt, Uncle, Grandmother, Grandfather, Niece, Nephew, Female Cousin, Male Cousin.\*\*

| Relationship to you (** see list above) | Mother's or father's side | Type of cancer | Approximate age when cancer diagnosed |
|-----------------------------------------|---------------------------|----------------|---------------------------------------|
| Example:<br>Aunt                        | Mother's side             | Breast         | 60's                                  |
|                                         |                           |                |                                       |
|                                         |                           |                |                                       |
|                                         |                           |                |                                       |
|                                         |                           |                |                                       |

54. Do you believe that an *increased risk of developing a disease other than cancer* runs in your family?

Yes

No

Don't Know

55. List any hereditary (genetic) diseases ***other than cancer*** that run in your family. Some examples are: Cystic fibrosis, Fragile X, Gaucher's disease, Hemochromatosis, Homocysteinuria, Huntington's disease, Muscular Dystrophy, Neurofibromatosis, Sickle-cell Anemia, Tay Sachs disease, and Thalassemia.

---

56. Other conditions may be common in families but are not strictly "genetic", meaning that we cannot identify one gene that explains their pattern in the family. Examples include high blood pressure, diabetes, dementia (Alzheimer's and others), and alcoholism. Please list any conditions that are common in your family.

---



---

**THANK YOU FOR COMPLETING OUR SURVEY!**

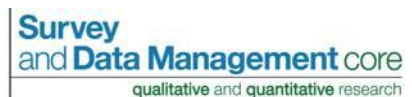

**List of Potential Cancers**

| Type of Cancer/Tumor/Malignancy                                                                                                                                                                                                                                                          |
|------------------------------------------------------------------------------------------------------------------------------------------------------------------------------------------------------------------------------------------------------------------------------------------|
| <ul style="list-style-type: none"> <li>• Lung Cancer</li> </ul>                                                                                                                                                                                                                          |
| <ul style="list-style-type: none"> <li>• Head and Neck Cancer:                             <ul style="list-style-type: none"> <li>○ Larynx</li> <li>○ Mouth</li> <li>○ Palate</li> <li>○ Throat</li> <li>○ Tongue</li> </ul> </li> </ul>                                                 |
| <ul style="list-style-type: none"> <li>• Breast Cancer (including DCIS)</li> </ul>                                                                                                                                                                                                       |
| <ul style="list-style-type: none"> <li>• Male Genito-Urinary:                             <ul style="list-style-type: none"> <li>○ Prostate</li> <li>○ Testis</li> <li>○ Other</li> </ul> </li> </ul>                                                                                    |
| <ul style="list-style-type: none"> <li>• Kidney</li> </ul>                                                                                                                                                                                                                               |
| <ul style="list-style-type: none"> <li>• Hematologic (Blood/Immune):                             <ul style="list-style-type: none"> <li>○ Leukemia</li> <li>○ Hodgkin's Disease</li> <li>○ Lymphoma</li> <li>○ Myeloma</li> <li>○ Waldenstrom's Macroglobulinemia</li> </ul> </li> </ul> |
| <ul style="list-style-type: none"> <li>• Skin Cancers:                             <ul style="list-style-type: none"> <li>○ Melanoma</li> <li>○ Basal Cell</li> <li>○ Sebaceous Adenoma</li> <li>○ Squamous Cell</li> </ul> </li> </ul>                                                  |
| <ul style="list-style-type: none"> <li>• Endocrine/Hormonal:                             <ul style="list-style-type: none"> <li>○ Adrenal gland (cortex)</li> <li>○ Carcinoid (lung or abdomen)</li> <li>○ Paraganglioma or Pheocromocytoma</li> <li>○ Thyroid</li> </ul> </li> </ul>    |

| Type of Cancer/Tumor/Malignancy                                                                                                                                                                                                                                                                                                          |
|------------------------------------------------------------------------------------------------------------------------------------------------------------------------------------------------------------------------------------------------------------------------------------------------------------------------------------------|
| <ul style="list-style-type: none"> <li>• Colon Cancer</li> </ul>                                                                                                                                                                                                                                                                         |
| <ul style="list-style-type: none"> <li>• Other Gastrointestinal cancer:                             <ul style="list-style-type: none"> <li>○ Esophagus</li> <li>○ Stomach</li> <li>○ Small Intestine</li> <li>○ Rectum</li> <li>○ Anus</li> <li>○ Appendix</li> <li>○ Gall bladder/ Biliary tree</li> <li>○ Liver</li> </ul> </li> </ul> |
| <ul style="list-style-type: none"> <li>• Pancreas</li> <li>• Pancreas Islet Cell</li> </ul>                                                                                                                                                                                                                                              |
| <ul style="list-style-type: none"> <li>• Female Genito-Urinary:                             <ul style="list-style-type: none"> <li>○ Cervix</li> <li>○ Endometrium (uterus lining)</li> <li>○ Uterus</li> <li>○ Ovary</li> <li>○ Fallopian Tube/Peritoneum</li> </ul> </li> </ul>                                                        |
| <ul style="list-style-type: none"> <li>• Bladder</li> </ul>                                                                                                                                                                                                                                                                              |
| <ul style="list-style-type: none"> <li>• Sarcoma:                             <ul style="list-style-type: none"> <li>○ Bone (Osteosarcoma)</li> <li>○ GIST</li> <li>○ Soft Tissue Sarcoma (includes Leiomyosarcoma, Liposarcoma, other)</li> </ul> </li> </ul>                                                                           |
| <ul style="list-style-type: none"> <li>• Brain Tumors:                             <ul style="list-style-type: none"> <li>○ Glioblastoma/Astrocytoma</li> <li>○ Medulloblastoma</li> <li>○ Hemangioblastoma</li> </ul> </li> </ul>                                                                                                       |
|                                                                                                                                                                                                                                                                                                                                          |
